# Supplementary material
Source: publisher figshare collection journal article supplement (https://karger.figshare.com/ndownloader/files/25291949)
Supplement: Supplementary file 1 [file 25291949]

**ACCESSORY TABLE 2**. Characteristics of cirrhotic and noncirrhotic patients after the propensity score matching (matching factors included treatment and multinodular disease). Categorical variables are reported as absolute frequencies (percentage). Continuous variables are reported as median (interquartile range).

| **Variable** | **Noncirrhotic patients (n=54)** | **Cirrhotic patients (n=54)** | **p** |
| --- | --- | --- | --- |
| Age (years) | 67 (59-73) | 65 (58-72) | 0.413 |
| Male sex | 29 (53.7) | 19 (35.2) | 0.081 |
| PS>0 | 14 (25.9) | 13 (24.1) | 1.000 |
| Main tumor dimension (mm) | 61 (40-90) | 37 (20-67) | <0.001 |
| Multinodular disease | 19 (35.2) | 21 (38.9) | 0.842 |
| N1 | 2 (3.7) | 7 (13.0) | 0.161 |
| M1 | 0 | 3 (5.6) | 0.243 |
| Macrovascular invasion | 4 (7.4) | 7 (13.0) | 0.540 |
| Tumor grading |  |  |  |
| - G1 | 25 (46.3) | 31 (57.4) | 0.452 |
| - G2 | 22 (40.7) | 16 (29.6) |
| - G3 | 7 (13.0) | 7 (13.0) |
| TNM stage |  |  |  |
| - 1a | 20 (37.0) | 27 (50.0) | 0.012 |
| - 1b | 14 (25.9) | 4 (7.4) |
| -2 | 18 (33.3) | 14 (25.9) |
| -3 | 2 (3.7) | 6 (11.1) |
| -4 | 0 | 3 (5.6) |
| Treatment |  |  |  |
| - Surgery | 41 (75.9) | 39 (72.2) | 0.827 |
| - Locoregional procedures | 1 (1.9) | 3 (5.6) | 0.618 |
| - Chemotherapy | 11 (20.4) | 9 (16.7) | 0.805 |
| - BSC | 1 (1.9) | 3 (5.6) | 0.618 |
